# Supplementary material for: Structural and magnetic properties of iron(ii) complexes with 1,4,5,8,9,12-hexaazatriphenylene (HAT)
Source: Royal Society of Chemistry journal article supplement (doi:10.1039/b502567b), 2005-01-01
Supplement: b502567b.pdf [file b502567b.pdf]

# Structural and magnetic properties of iron(II) complexes with 1,4,5,8,9,12-hexaazatriphenylene (HAT)

Mikhail Shatruk, Abdellatif Chouai, Andrey V. Prosvirin, Kim R. Dunbar\*  
*Department of Chemistry, Texas A&M University, College Station, TX 77842*

## Supplementary materials

Page 2 – Fig. 1A. ORTEP plot of the asymmetric unit in the crystals structure of **1**.

Page 3 – Fig. 2A. ORTEP plot of the asymmetric unit in the crystals structure of **2**.

Page 4 – Fig. 3A. ORTEP plot of the asymmetric unit in the crystals structure of **3**.

Page 5 – Fig. 4A. ORTEP plot of the asymmetric unit in the crystals structure of **4**.

Page 6 – Table 1A. Positional and thermal parameters for **1**.

Page 8 – Table 1B. Bond distances (Å) in the crystal structure of **1**.

Page 9 – Table 1C. Bond angles (°) in the crystal structure of **1**.

Page 10 – Table 2A. Positional and thermal parameters for **2**.

Page 12 – Table 2B. Bond distances (Å) in the crystal structure of **2**.

Page 12 – Table 2C. Bond angles (°) in the crystal structure of **2**.

Page 13 – Table 3A. Positional and thermal parameters for **3**.

Page 15 – Table 3B. Bond distances (Å) in the crystal structure of **3**.

Page 15 – Table 3C. Bond angles (°) in the crystal structure of **3**.

Page 16 – Table 4A. Positional and thermal parameters for **4**.

Page 19 – Table 4B. Bond distances (Å) in the crystal structure of **4**.

Page 19 – Table 4C. Bond angles (°) in the crystal structure of **4**.

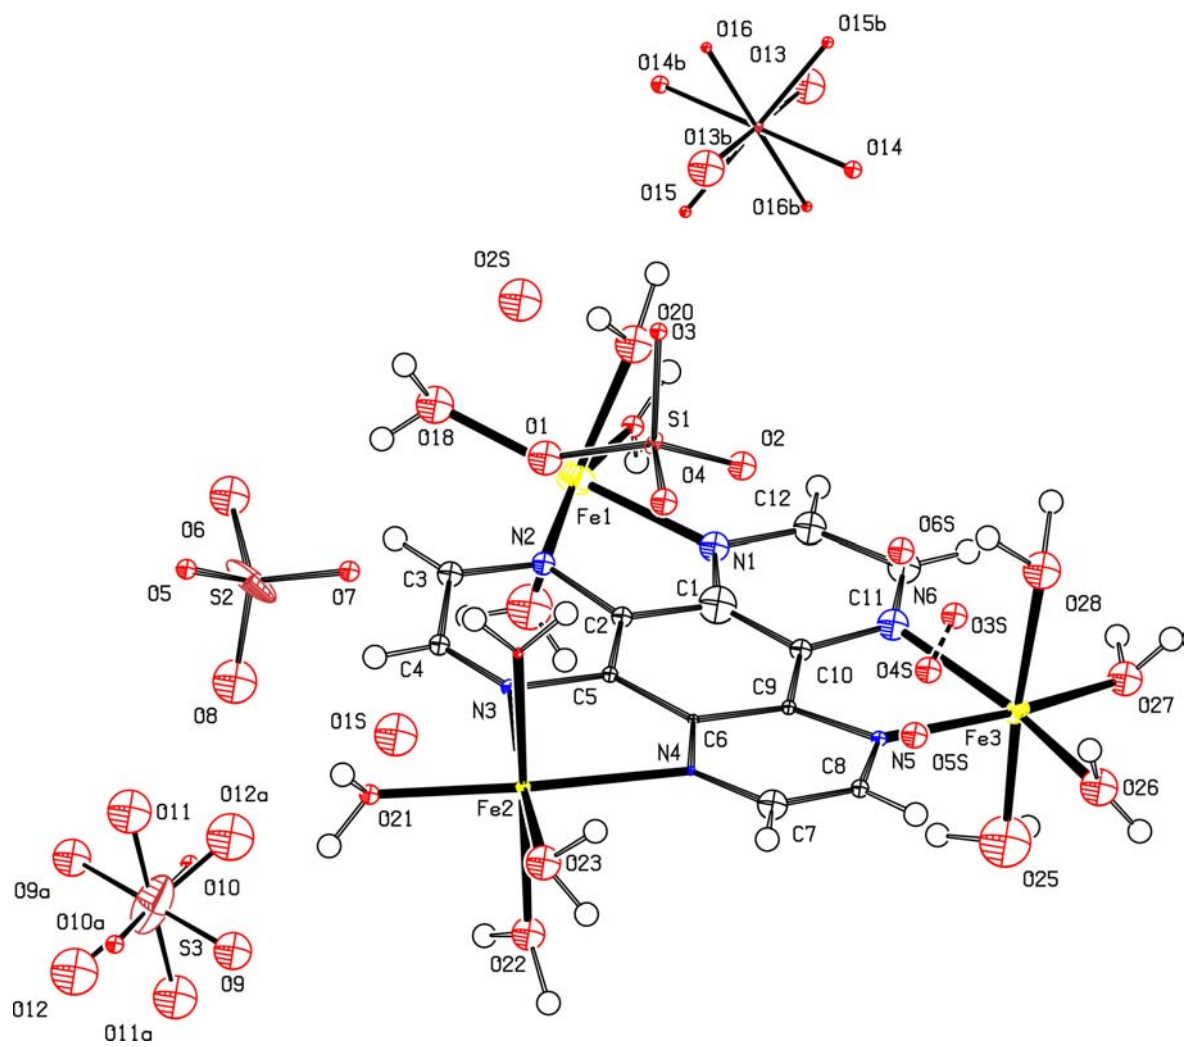

Fig. 1A. ORTEP plot of the asymmetric unit in the crystals structure of **1**.

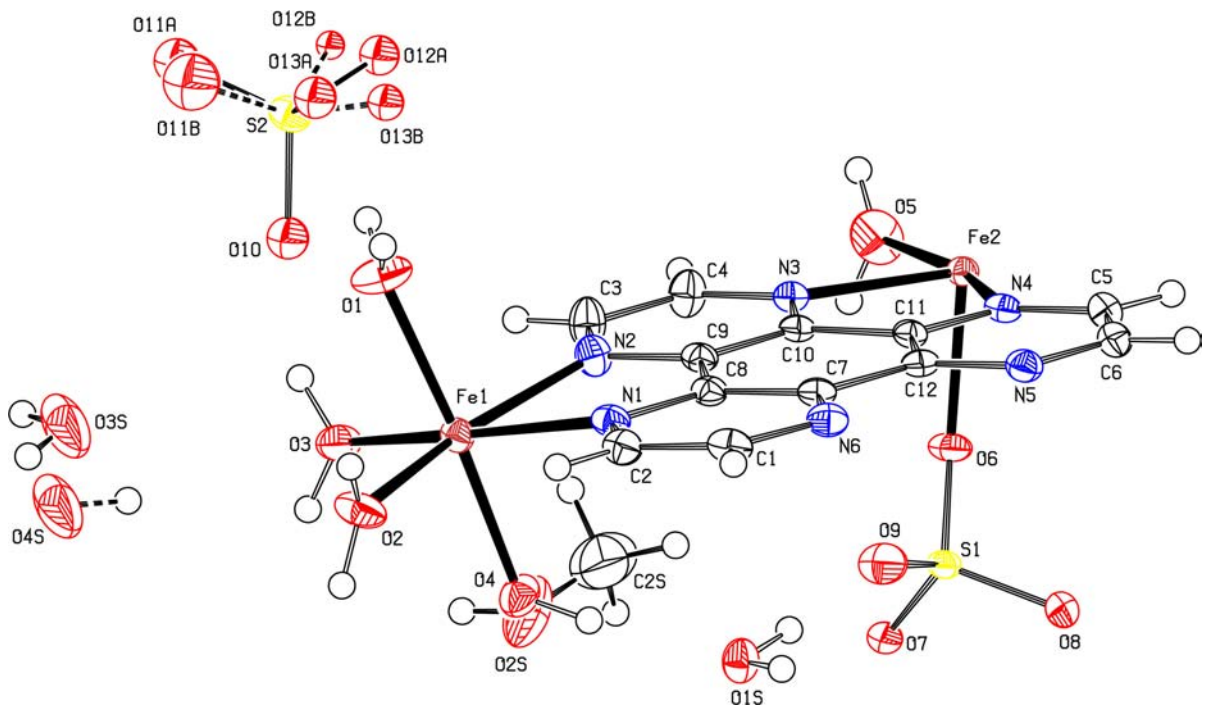

Fig. 2A. ORTEP plot of the asymmetric unit in the crystals structure of **2**.

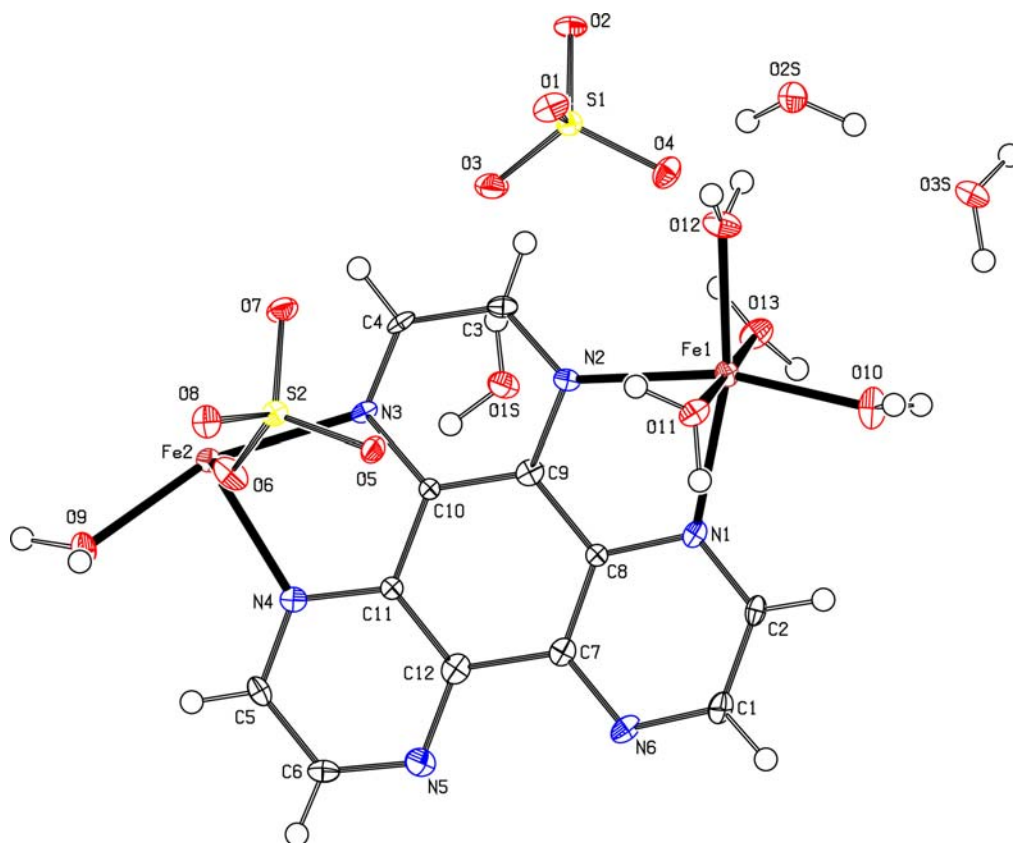

Fig. 3A. ORTEP plot of the asymmetric unit in the crystals structure of **3**.

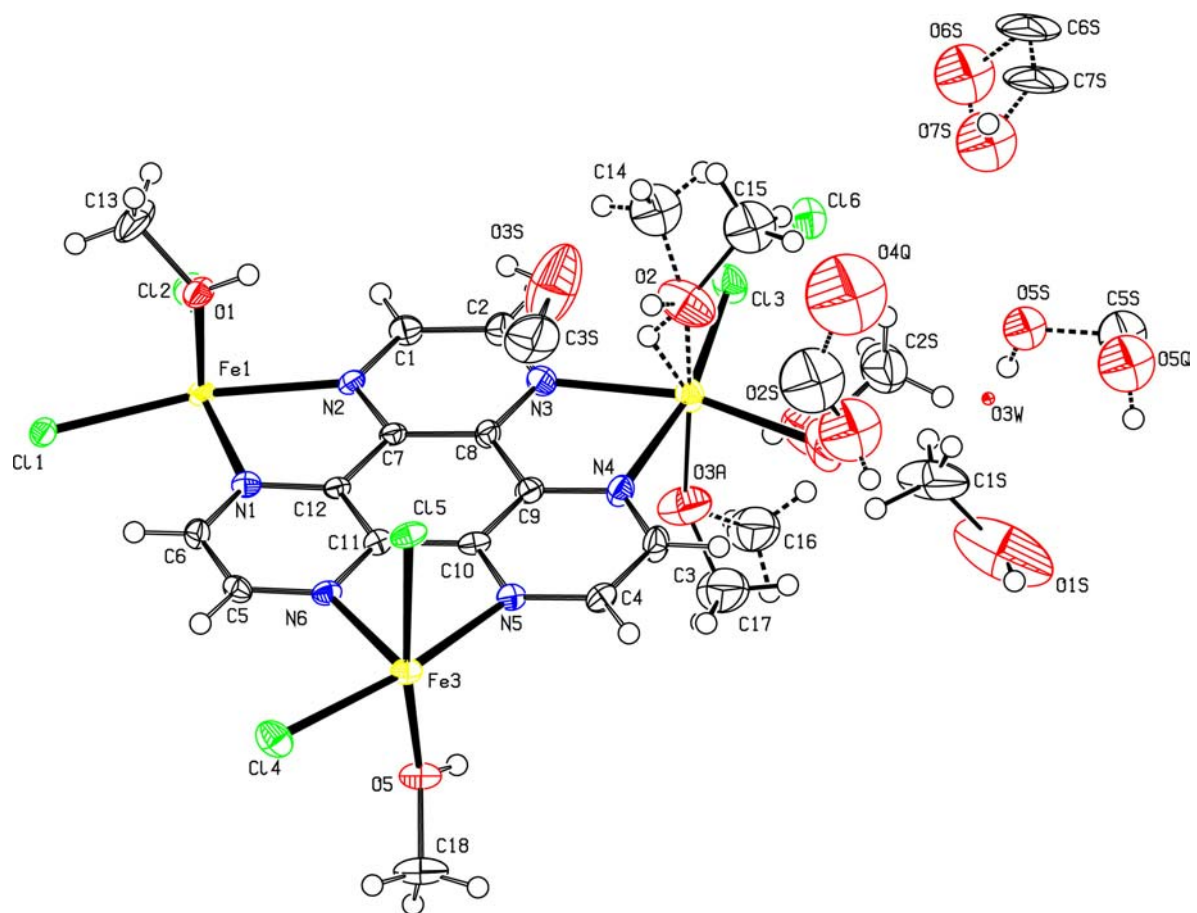

Fig. 4A. ORTEP plot of the asymmetric unit in the crystals structure of **4**.

Table 1A. Positional and thermal parameters for **1**.

| Atom  | Position | $x/a$      | $y/b$       | $z/c$       | S.o.f. | $U_{eq}$   |
|-------|----------|------------|-------------|-------------|--------|------------|
| Fe(1) | 4e       | 0.0867(1)  | 0.3705(2)   | -0.1624(1)  | 1      | 0.0220(5)  |
| Fe(2) | 4e       | 0.41489(9) | 0.3685(1)   | 0.1575(1)   | 1      | 0.0033(4)  |
| Fe(3) | 4e       | 0.2529(3)  | 0.8725(1)   | -0.0019(4)  | 1      | 0.0102(3)  |
| S(1)  | 4e       | 0.1535(2)  | 0.4467(2)   | 0.1851(2)   | 1      | 0.0075(7)  |
| S(2)  | 4e       | 0.3371(2)  | 0.0484(4)   | 0.2993(2)   | 1      | 0.033(1)   |
| S(3)  | 2d       | 0.5        | 0           | 0           | 1      | 0.051(2)   |
| S(4)  | 2a       | 0          | 0           | 0           | 1      | 0.0023(8)  |
| O(1)  | 4e       | 0.1657(5)  | 0.3355(7)   | 0.1445(6)   | 1      | 0.021(2)   |
| O(2)  | 4e       | 0.1443(4)  | 0.5428(7)   | 0.1327(5)   | 1      | 0.014(2)   |
| O(3)  | 4e       | 0.0840(4)  | 0.4324(6)   | 0.2318(5)   | 1      | 0.005      |
| O(4)  | 4e       | 0.2162(4)  | 0.4671(6)   | 0.2551(5)   | 1      | 0.012(2)   |
| O(5)  | 4e       | 0.3605(4)  | -0.0216(6)  | 0.3828(5)   | 1      | 0.007(2)   |
| O(6)  | 4e       | 0.2630(5)  | 0.0113(8)   | 0.2511(6)   | 1      | 0.028(2)   |
| O(7)  | 4e       | 0.3297(4)  | 0.1493(6)   | 0.3395(5)   | 1      | 0.007(2)   |
| O(8)  | 4e       | 0.3972(5)  | 0.0483(9)   | 0.2445(7)   | 1      | 0.034(3)   |
| O(9)  | 4e       | 0.5424(10) | 0.0922(15)  | 0.0600(12)  | 0.5    | 0.025(4)   |
| O(10) | 4e       | 0.4434(8)  | 0.0325(12)  | -0.0766(9)  | 0.5    | 0.006(3)   |
| O(11) | 4e       | 0.4550(11) | -0.0399(17) | 0.0710(13)  | 0.5    | 0.034(5)   |
| O(12) | 4e       | 0.5536(12) | -0.0702(18) | -0.0188(14) | 0.5    | 0.040(5)   |
| O(13) | 4e       | 0.0535(10) | 0.0458(16)  | 0.0579(12)  | 0.5    | 0.023(4)   |
| O(14) | 4e       | -0.0324(8) | 0.1084(12)  | -0.0426(10) | 0.5    | 0.005(3)   |
| O(15) | 4e       | -0.0636(8) | -0.0601(12) | 0.0260(9)   | 0.5    | 0.0022(15) |
| O(16) | 4e       | 0.0318(7)  | -0.0661(12) | -0.0712(9)  | 0.5    | 0.0018(15) |
| O(17) | 4e       | 0.1569(5)  | 0.3443(6)   | -0.2651(6)  | 1      | 0.038(3)   |
| O(18) | 4e       | 0.0495(4)  | 0.2110(6)   | -0.1619(5)  | 1      | 0.025      |
| O(19) | 4e       | 0.0119(3)  | 0.4220(6)   | -0.2636(4)  | 1      | 0.008(2)   |
| O(20) | 4e       | 0.0057(4)  | 0.4093(7)   | -0.0771(5)  | 1      | 0.025      |
| O(21) | 4e       | 0.4341(3)  | 0.2088(6)   | 0.1415(4)   | 1      | 0.007(2)   |
| O(22) | 4e       | 0.4965(4)  | 0.3985(6)   | 0.0687(5)   | 1      | 0.019(2)   |
| O(23) | 4e       | 0.4985(4)  | 0.4023(6)   | 0.2601(5)   | 1      | 0.021(2)   |
| O(24) | 4e       | 0.3447(4)  | 0.3400(5)   | 0.2547(4)   | 1      | 0.0016(16) |
| O(25) | 4e       | 0.3271(6)  | 0.8824(7)   | -0.0815(6)  | 1      | 0.048(3)   |
| O(26) | 4e       | 0.3220(4)  | 0.9717(6)   | 0.0769(5)   | 1      | 0.025      |
| O(27) | 4e       | 0.1914(4)  | 0.9803(6)   | -0.0845(5)  | 1      | 0.021(2)   |
| O(28) | 4e       | 0.1764(4)  | 0.8748(7)   | 0.1029(5)   | 1      | 0.025      |
| N(1)  | 4e       | 0.1294(5)  | 0.5278(8)   | -0.1321(7)  | 1      | 0.015(2)   |
| N(2)  | 4e       | 0.1837(5)  | 0.3515(8)   | -0.0590(6)  | 1      | 0.009(2)   |
| N(3)  | 4e       | 0.3142(5)  | 0.3375(8)   | 0.0588(6)   | 1      | 0.005(2)   |
| N(4)  | 4e       | 0.3732(5)  | 0.5410(7)   | 0.1255(6)   | 1      | 0.0013(16) |
| N(5)  | 4e       | 0.3104(5)  | 0.7328(7)   | 0.0688(6)   | 1      | 0.004(1)   |
| N(6)  | 4e       | 0.1881(6)  | 0.7281(9)   | -0.0545(7)  | 1      | 0.017(3)   |

| Atom   | Position | $x/a$     | $y/b$      | $z/c$      | S.o.f. | $U_{eq}$ |
|--------|----------|-----------|------------|------------|--------|----------|
| C(1)   | 4e       | 0.1921(2) | 0.5409(2)  | -0.0629(2) | 1      | 0.026(3) |
| C(2)   | 4e       | 0.2215(2) | 0.4429(2)  | -0.0324(3) | 1      | 0.008(2) |
| C(5)   | 4e       | 0.2839(2) | 0.4400(2)  | 0.0306(3)  | 1      | 0.004(1) |
| C(6)   | 4e       | 0.3168(2) | 0.5350(2)  | 0.0632(3)  | 1      | 0.002(1) |
| C(9)   | 4e       | 0.2873(2) | 0.6330(2)  | 0.0327(3)  | 1      | 0.004(1) |
| C(10)  | 4e       | 0.2250(2) | 0.6359(2)  | -0.0304(3) | 1      | 0.009(2) |
| C(3)   | 4e       | 0.2112(2) | 0.2556(2)  | -0.0299(3) | 1      | 0.011(2) |
| H(3)   | 4e       | 0.1867    | 0.1919     | -0.0469    | 1      | 0.014    |
| C(4)   | 4e       | 0.2824(2) | 0.2563(2)  | 0.0304(3)  | 1      | 0.007(2) |
| H(4)   | 4e       | 0.3040    | 0.1906     | 0.0475     | 1      | 0.009    |
| C(7)   | 4e       | 0.3993(6) | 0.6324(10) | 0.1617(8)  | 1      | 0.016(3) |
| H(7)   | 4e       | 0.4387    | 0.6328     | 0.2069     | 1      | 0.019    |
| C(8)   | 4e       | 0.3680(6) | 0.7213(9)  | 0.1322(7)  | 1      | 0.006(2) |
| H(8)   | 4e       | 0.3879    | 0.7841     | 0.1581     | 1      | 0.007    |
| C(11)  | 4e       | 0.1268(7) | 0.7298(11) | -0.1136(8) | 1      | 0.019(3) |
| H(11)  | 4e       | 0.1028    | 0.7937     | -0.1307    | 1      | 0.023    |
| C(12)  | 4e       | 0.0990(7) | 0.6247(11) | -0.1506(9) | 1      | 0.019(3) |
| H(12)  | 4e       | 0.0559    | 0.6264     | -0.1908    | 1      | 0.023    |
| H(17A) | 4e       | 0.1603    | 0.2816     | -0.3038    | 1      | 0.023    |
| H(17B) | 4e       | 0.1964    | 0.3904     | -0.2494    | 1      | 0.023    |
| H(18A) | 4e       | 0.0774    | 0.1612     | -0.1745    | 1      | 0.023    |
| H(18B) | 4e       | 0.0378    | 0.1721     | -0.1139    | 1      | 0.023    |
| H(19A) | 4e       | 0.0210    | 0.4320     | -0.3190    | 1      | 0.023    |
| H(19B) | 4e       | -0.0293   | 0.4504     | -0.2511    | 1      | 0.023    |
| H(20A) | 4e       | -0.0486   | 0.4212     | -0.0752    | 1      | 0.023    |
| H(20B) | 4e       | 0.0055    | 0.3680     | -0.0281    | 1      | 0.023    |
| H(21A) | 4e       | 0.4721    | 0.1750     | 0.1253     | 1      | 0.023    |
| H(21B) | 4e       | 0.4354    | 0.1768     | 0.1850     | 1      | 0.023    |
| H(22A) | 4e       | 0.4878    | 0.3529     | 0.0163     | 1      | 0.023    |
| H(22B) | 4e       | 0.5491    | 0.4315     | 0.0816     | 1      | 0.023    |
| H(23A) | 4e       | 0.5292    | 0.4562     | 0.2531     | 1      | 0.023    |
| H(23B) | 4e       | 0.4801    | 0.4512     | 0.2981     | 1      | 0.023    |
| H(24A) | 4e       | 0.3180    | 0.3835     | 0.2827     | 1      | 0.023    |
| H(24B) | 4e       | 0.3395    | 0.2885     | 0.3037     | 1      | 0.023    |
| H(25A) | 4e       | 0.3212    | 0.8106     | -0.1125    | 1      | 0.023    |
| H(25B) | 4e       | 0.2992    | 0.9040     | -0.1304    | 1      | 0.023    |
| H(26A) | 4e       | 0.3434    | 1.0216     | 0.0553     | 1      | 0.023    |
| H(26B) | 4e       | 0.3122    | 0.9554     | 0.1327     | 1      | 0.023    |
| H(27A) | 4e       | 0.1507    | 0.9648     | -0.1197    | 1      | 0.023    |
| H(27B) | 4e       | 0.1625    | 1.0220     | -0.0641    | 1      | 0.023    |
| H(28A) | 4e       | 0.1216    | 0.8728     | 0.0915     | 1      | 0.023    |
| H(28B) | 4e       | 0.1722    | 0.8125     | 0.1478     | 1      | 0.023    |
| O(1S)  | 4e       | 0.4724(2) | 0.2738(3)  | -0.0666(4) | 1      | 0.032(2) |
| O(2S)  | 4e       | 0.0294(2) | 0.2824(3)  | 0.0684(3)  | 1      | 0.033(3) |
| O(3S)  | 4e       | 0.2714(5) | -0.2093(3) | 0.2778(5)  | 0.33   | 0.011(2) |

| Atom  | Position | $x/a$     | $y/b$      | $z/c$     | S.o.f. | $U_{eq}$ |
|-------|----------|-----------|------------|-----------|--------|----------|
| O(4S) | 4e       | 0.3221(5) | -0.2274(4) | 0.3034(5) | 0.33   | 0.011(2) |
| O(5S) | 4e       | 0.3787(5) | -0.2309(4) | 0.3261(5) | 0.34   | 0.011(2) |
| O(6S) | 4e       | 0.2132(5) | -0.2762(3) | 0.2212(5) | 0.34   | 0.011(2) |

Table 1B. Bond distances ( $\text{\AA}$ ) in the crystal structure of **1**.

|             |           |             |           |
|-------------|-----------|-------------|-----------|
| Fe(1)–O(19) | 2.031(6)  | S(3)–O(11)  | 1.53(2)   |
| Fe(1)–O(18) | 2.101(8)  | S(3)–O(9)   | 1.606(18) |
| Fe(1)–N(1)  | 2.137(10) | S(4)–O(13)  | 1.355(18) |
| Fe(1)–O(20) | 2.147(8)  | S(4)–O(15)  | 1.471(15) |
| Fe(1)–O(17) | 2.177(10) | S(4)–O(16)  | 1.541(14) |
| Fe(1)–N(2)  | 2.224(9)  | S(4)–O(14)  | 1.581(15) |
| Fe(2)–O(21) | 2.041(7)  | N(1)–C(12)  | 1.343(17) |
| Fe(2)–O(23) | 2.083(8)  | N(1)–C(1)   | 1.461(10) |
| Fe(2)–O(24) | 2.114(7)  | N(2)–C(3)   | 1.348(10) |
| Fe(2)–O(22) | 2.170(8)  | N(2)–C(2)   | 1.365(10) |
| Fe(2)–N(3)  | 2.249(9)  | N(3)–C(4)   | 1.217(10) |
| Fe(2)–N(4)  | 2.312(9)  | N(3)–C(5)   | 1.435(10) |
| Fe(3)–O(25) | 1.936(12) | N(4)–C(6)   | 1.309(9)  |
| Fe(3)–O(26) | 2.042(9)  | N(4)–C(7)   | 1.328(15) |
| Fe(3)–O(27) | 2.072(9)  | N(5)–C(8)   | 1.341(13) |
| Fe(3)–N(5)  | 2.237(9)  | N(5)–C(9)   | 1.404(9)  |
| Fe(3)–N(6)  | 2.242(11) | N(6)–C(11)  | 1.339(16) |
| Fe(3)–O(28) | 2.258(10) | N(6)–C(10)  | 1.357(11) |
| S(1)–O(2)   | 1.442(9)  | C(1)–C(2)   | 1.3900    |
| S(1)–O(4)   | 1.481(8)  | C(1)–C(10)  | 1.3900    |
| S(1)–O(3)   | 1.537(8)  | C(2)–C(5)   | 1.3900    |
| S(1)–O(1)   | 1.548(9)  | C(5)–C(6)   | 1.3900    |
| S(2)–O(7)   | 1.416(9)  | C(6)–C(9)   | 1.3900    |
| S(2)–O(8)   | 1.460(11) | C(9)–C(10)  | 1.3900    |
| S(2)–O(6)   | 1.517(10) | C(3)–C(4)   | 1.4886    |
| S(2)–O(5)   | 1.566(8)  | C(7)–C(8)   | 1.299(16) |
| S(3)–O(12)  | 1.36(2)   | C(11)–C(12) | 1.491(19) |
| S(3)–O(10)  | 1.513(14) |             |           |



Table 1C. Bond angles (°) in the crystal structure of **1**.

|                   |          |                  |           |
|-------------------|----------|------------------|-----------|
| O(19)–Fe(1)–O(18) | 96.9(3)  | N(5)–Fe(3)–O(28) | 87.3(4)   |
| O(19)–Fe(1)–N(1)  | 93.6(3)  | N(6)–Fe(3)–O(28) | 85.9(4)   |
| O(18)–Fe(1)–N(1)  | 167.3(4) | O(2)–S(1)–O(4)   | 106.6(5)  |
| O(19)–Fe(1)–O(20) | 87.6(3)  | O(2)–S(1)–O(3)   | 108.3(5)  |
| O(18)–Fe(1)–O(20) | 88.1(3)  | O(4)–S(1)–O(3)   | 106.0(4)  |
| N(1)–Fe(1)–O(20)  | 85.2(4)  | O(2)–S(1)–O(1)   | 122.1(5)  |
| O(19)–Fe(1)–O(17) | 83.4(3)  | O(4)–S(1)–O(1)   | 108.2(5)  |
| O(18)–Fe(1)–O(17) | 94.4(3)  | O(3)–S(1)–O(1)   | 104.6(5)  |
| N(1)–Fe(1)–O(17)  | 93.9(4)  | O(7)–S(2)–O(8)   | 111.8(6)  |
| O(20)–Fe(1)–O(17) | 170.8(3) | O(7)–S(2)–O(6)   | 111.0(5)  |
| O(19)–Fe(1)–N(2)  | 165.6(3) | O(8)–S(2)–O(6)   | 113.2(6)  |
| O(18)–Fe(1)–N(2)  | 96.9(3)  | O(7)–S(2)–O(5)   | 99.6(5)   |
| N(1)–Fe(1)–N(2)   | 73.3(4)  | O(8)–S(2)–O(5)   | 109.3(5)  |
| O(20)–Fe(1)–N(2)  | 97.2(3)  | O(6)–S(2)–O(5)   | 111.0(5)  |
| O(17)–Fe(1)–N(2)  | 91.3(3)  | O(12)–S(3)–O(10) | 115.7(10) |
| O(21)–Fe(2)–O(23) | 99.8(3)  | O(12)–S(3)–O(11) | 113.7(12) |
| O(21)–Fe(2)–O(24) | 92.8(3)  | O(10)–S(3)–O(11) | 106.0(9)  |
| O(23)–Fe(2)–O(24) | 86.6(3)  | O(12)–S(3)–O(9)  | 106.3(11) |
| O(21)–Fe(2)–O(22) | 87.3(3)  | O(10)–S(3)–O(9)  | 118.7(8)  |
| O(23)–Fe(2)–O(22) | 87.5(3)  | O(11)–S(3)–O(9)  | 94.6(10)  |
| O(24)–Fe(2)–O(22) | 174.0(3) | O(13)–S(4)–O(15) | 123.6(10) |
| O(21)–Fe(2)–N(3)  | 83.5(3)  | O(13)–S(4)–O(16) | 113.1(9)  |
| O(23)–Fe(2)–N(3)  | 172.5(3) | O(15)–S(4)–O(16) | 107.4(8)  |
| O(24)–Fe(2)–N(3)  | 86.6(3)  | O(13)–S(4)–O(14) | 96.2(10)  |
| O(22)–Fe(2)–N(3)  | 99.4(3)  | O(15)–S(4)–O(14) | 106.7(8)  |
| O(21)–Fe(2)–N(4)  | 159.7(3) | O(16)–S(4)–O(14) | 108.4(8)  |
| O(23)–Fe(2)–N(4)  | 99.1(3)  | C(12)–N(1)–C(1)  | 108.2(9)  |
| O(24)–Fe(2)–N(4)  | 95.6(3)  | C(12)–N(1)–Fe(1) | 130.7(8)  |
| O(22)–Fe(2)–N(4)  | 86.3(3)  | C(1)–N(1)–Fe(1)  | 119.1(6)  |
| N(3)–Fe(2)–N(4)   | 78.6(3)  | C(3)–N(2)–C(2)   | 119.5(7)  |
| O(25)–Fe(3)–O(26) | 85.1(4)  | C(3)–N(2)–Fe(1)  | 123.7(6)  |
| O(25)–Fe(3)–O(27) | 86.1(4)  | C(2)–N(2)–Fe(1)  | 116.3(6)  |
| O(26)–Fe(3)–O(27) | 102.1(3) | C(4)–N(3)–C(5)   | 119.2(7)  |
| O(25)–Fe(3)–N(5)  | 92.3(4)  | C(4)–N(3)–Fe(2)  | 133.5(6)  |
| O(26)–Fe(3)–N(5)  | 88.4(4)  | C(5)–N(3)–Fe(2)  | 107.2(5)  |
| O(27)–Fe(3)–N(5)  | 169.1(4) | C(6)–N(4)–C(7)   | 123.9(9)  |
| O(25)–Fe(3)–N(6)  | 101.3(4) | C(6)–N(4)–Fe(2)  | 107.7(5)  |
| O(26)–Fe(3)–N(6)  | 162.2(4) | C(7)–N(4)–Fe(2)  | 128.4(7)  |
| O(27)–Fe(3)–N(6)  | 94.9(4)  | C(8)–N(5)–C(9)   | 110.8(8)  |
| N(5)–Fe(3)–N(6)   | 74.8(3)  | C(8)–N(5)–Fe(3)  | 134.9(8)  |
| O(25)–Fe(3)–O(28) | 172.5(4) | C(9)–N(5)–Fe(3)  | 113.8(5)  |
| O(26)–Fe(3)–O(28) | 87.4(4)  | C(11)–N(6)–C(10) | 122.3(10) |
| O(27)–Fe(3)–O(28) | 95.7(3)  | C(11)–N(6)–Fe(3) | 125.5(9)  |
| C(10)–N(6)–Fe(3)  | 111.5(6) | C(5)–C(6)–C(9)   | 120.0     |

|                 |          |                  |           |
|-----------------|----------|------------------|-----------|
| C(2)–C(1)–C(10) | 120.0    | C(6)–C(9)–C(10)  | 120.0     |
| C(2)–C(1)–N(1)  | 112.0(4) | C(6)–C(9)–N(5)   | 124.4(4)  |
| C(10)–C(1)–N(1) | 127.9(4) | C(10)–C(9)–N(5)  | 115.1(4)  |
| N(2)–C(2)–C(1)  | 118.5(4) | N(6)–C(10)–C(9)  | 122.7(5)  |
| N(2)–C(2)–C(5)  | 121.1(4) | N(6)–C(10)–C(1)  | 116.8(5)  |
| C(1)–C(2)–C(5)  | 120.0    | C(9)–C(10)–C(1)  | 120.0     |
| C(6)–C(5)–C(2)  | 120.0    | N(2)–C(3)–C(4)   | 117.0(4)  |
| C(6)–C(5)–N(3)  | 121.4(4) | N(3)–C(4)–C(3)   | 124.0(5)  |
| C(2)–C(5)–N(3)  | 118.6(4) | C(7)–C(8)–N(5)   | 127.5(11) |
| N(4)–C(6)–C(5)  | 124.8(4) | N(6)–C(11)–C(12) | 117.1(12) |
| N(4)–C(6)–C(9)  | 115.2(4) | N(1)–C(12)–C(11) | 126.9(11) |

Table 2A. Positional and thermal parameters for **2**.

| Atom | Position   | <i>x/a</i> | <i>y/b</i> | <i>z/c</i>  | S.o.f.   | <i>U</i> <sub>eq</sub> |
|------|------------|------------|------------|-------------|----------|------------------------|
| Fe1  | 4 <i>e</i> | 0.47167(5) | 0.69197(1) | 0.00807(3)  | 1        | 0.01650(7)             |
| Fe2  | 4 <i>e</i> | 0.23476(5) | 0.55443(1) | 0.46072(2)  | 1        | 0.01348(7)             |
| S1   | 4 <i>e</i> | 0.25897(8) | 0.45847(2) | 0.59147(4)  | 1        | 0.0157(1)              |
| S2   | 4 <i>e</i> | 0.04404(9) | 0.69789(2) | -0.30111(5) | 1        | 0.0198(1)              |
| O1   | 4 <i>e</i> | 0.1928(3)  | 0.72580(7) | -0.0250(1)  | 1        | 0.0305(5)              |
| O2   | 2 <i>d</i> | 0.5627(3)  | 0.70717(7) | -0.1442(1)  | 1        | 0.0268(4)              |
| O3   | 2 <i>a</i> | 0.5628(3)  | 0.75153(6) | 0.0873(1)   | 1        | 0.0251(4)              |
| O4   | 4 <i>e</i> | 0.7622(3)  | 0.66561(6) | 0.0552(1)   | 1        | 0.0251(4)              |
| O5   | 4 <i>e</i> | 0.2563(3)  | 0.60690(6) | 0.5728(2)   | 1        | 0.0362(5)              |
| O6   | 4 <i>e</i> | 0.4396(2)  | 0.44672(6) | 0.5271(1)   | 1        | 0.0205(4)              |
| O7   | 4 <i>e</i> | 0.0861(2)  | 0.43111(5) | 0.5464(1)   | 1        | 0.0203(4)              |
| O8   | 4 <i>e</i> | 0.2096(2)  | 0.50722(5) | 0.5778(1)   | 1        | 0.0191(4)              |
| O9   | 4 <i>e</i> | 0.2959(3)  | 0.44903(6) | 0.7046(1)   | 1        | 0.0285(4)              |
| O10  | 4 <i>e</i> | 0.2687(3)  | 0.70221(6) | -0.2978(1)  | 1        | 0.0245(4)              |
| O11A | 4 <i>e</i> | -0.0146(3) | 0.64923(7) | -0.3030(2)  | 0.905(2) | 0.0291(5)              |
| O12A | 4 <i>e</i> | -0.0428(3) | 0.71855(6) | -0.2036(2)  | 0.905(2) | 0.0219(4)              |
| O13A | 4 <i>e</i> | -0.0403(3) | 0.72091(6) | -0.3961(2)  | 0.905(2) | 0.0243(4)              |
| O11B | 4 <i>e</i> | -0.021(4)  | 0.6672(8)  | -0.382(2)   | 0.095(2) | 0.045(6)               |
| O12B | 4 <i>e</i> | -0.044(2)  | 0.6976(5)  | -0.201(1)   | 0.095(2) | 0.011(3)               |
| O13B | 4 <i>e</i> | -0.038(3)  | 0.7453(6)  | -0.361(1)   | 0.095(2) | 0.018(4)               |
| N1   | 4 <i>e</i> | 0.3700(3)  | 0.62214(7) | -0.0438(1)  | 1        | 0.0170(4)              |
| N2   | 4 <i>e</i> | 0.3569(3)  | 0.65999(7) | 0.1550(2)   | 1        | 0.0202(5)              |
| N3   | 4 <i>e</i> | 0.2741(3)  | 0.60616(6) | 0.3332(1)   | 1        | 0.0153(4)              |
| N4   | 4 <i>e</i> | 0.2143(3)  | 0.51512(6) | 0.3106(2)   | 1        | 0.0161(4)              |
| N5   | 4 <i>e</i> | 0.2101(3)  | 0.47517(6) | 0.1056(2)   | 1        | 0.0180(4)              |
| N6   | 4 <i>e</i> | 0.2841(3)  | 0.52889(7) | -0.0727(2)  | 1        | 0.0185(4)              |
| C1   | 4 <i>e</i> | 0.3224(3)  | 0.55653(8) | -0.1541(2)  | 1        | 0.0205(5)              |
| H1   | 4 <i>e</i> | 0.3196     | 0.5447     | -0.2231     | 1        | 0.025                  |
| C2   | 4 <i>e</i> | 0.3667(3)  | 0.60272(8) | -0.1401(2)  | 1        | 0.0192(5)              |

| Atom | Position | $x/a$      | $y/b$       | $z/c$       | S.o.f.   | $U_{eq}$  |
|------|----------|------------|-------------|-------------|----------|-----------|
| H2   | 4e       | 0.3946     | 0.6203      | -0.1997     | 1        | 0.023     |
| C3   | 4e       | 0.3481(4)  | 0.67760(8)  | 0.2528(2)   | 1        | 0.0253(6) |
| H3   | 4e       | 0.3700     | 0.7085      | 0.2625      | 1        | 0.030     |
| C4   | 4e       | 0.3063(4)  | 0.65021(8)  | 0.3417(2)   | 1        | 0.0231(6) |
| H4   | 4e       | 0.3012     | 0.6636      | 0.4089      | 1        | 0.028     |
| C5   | 4e       | 0.1790(3)  | 0.47098(8)  | 0.2964(2)   | 1        | 0.0193(5) |
| H5   | 4e       | 0.1552     | 0.4527      | 0.3555      | 1        | 0.023     |
| C6   | 4e       | 0.1770(3)  | 0.45146(8)  | 0.1938(2)   | 1        | 0.0192(5) |
| H6   | 4e       | 0.1514     | 0.4205      | 0.1874      | 1        | 0.023     |
| C7   | 4e       | 0.2858(3)  | 0.54815(8)  | 0.0253(2)   | 1        | 0.0161(5) |
| C8   | 4e       | 0.3256(3)  | 0.59458(8)  | 0.0396(2)   | 1        | 0.0153(5) |
| C9   | 4e       | 0.3205(3)  | 0.61483(8)  | 0.1453(2)   | 1        | 0.0161(5) |
| C10  | 4e       | 0.2798(3)  | 0.58825(7)  | 0.2335(2)   | 1        | 0.0148(5) |
| C11  | 4e       | 0.2464(3)  | 0.53974(7)  | 0.2206(2)   | 1        | 0.0149(5) |
| C12  | 4e       | 0.2460(3)  | 0.52005(8)  | 0.1191(2)   | 1        | 0.0160(5) |
| H1A  | 4e       | 0.124(3)   | 0.7412(6)   | 0.0264(11)  | 1        | 0.019     |
| H2A  | 4e       | 0.4630(18) | 0.7062(9)   | -0.1961(14) | 1        | 0.019     |
| H3A  | 4e       | 0.6930(16) | 0.7615(7)   | 0.089(2)    | 1        | 0.019     |
| H4A  | 4e       | 0.811(3)   | 0.6773(5)   | 0.1199(12)  | 1        | 0.019     |
| H5A  | 4e       | 0.3846(16) | 0.6168(8)   | 0.5821(19)  | 1        | 0.019     |
| H1B  | 4e       | 0.113(3)   | 0.7185(7)   | -0.0830(11) | 1        | 0.019     |
| H2B  | 4e       | 0.6912(17) | 0.7078(9)   | -0.1706(17) | 1        | 0.019     |
| H3B  | 4e       | 0.469(2)   | 0.7732(6)   | 0.1077(19)  | 1        | 0.019     |
| H4B  | 4e       | 0.782(4)   | 0.6353(4)   | 0.0507(16)  | 1        | 0.019     |
| H5B  | 4e       | 0.161(2)   | 0.6228(7)   | 0.6103(17)  | 1        | 0.019     |
| O1S  | 4e       | 0.8253(3)  | 0.57692(5)  | 0.0931(1)   | 1        | 0.0221(4) |
| H1SA | 4e       | 0.803(4)   | 0.5530(5)   | 0.0454(11)  | 1        | 0.019     |
| H1SB | 4e       | 0.787(4)   | 0.5677(7)   | 0.1603(9)   | 1        | 0.019     |
| O2S  | 4e       | 0.1132(4)  | 0.31025(8)  | 0.7437(2)   | 0.818(4) | 0.0451(8) |
| H2S  | 4e       | 0.0914     | 0.2829      | 0.7409      | 0.818(4) | 0.054     |
| C2S  | 4e       | 0.1804(7)  | 0.32532(16) | 0.6444(5)   | 0.818(4) | 0.073(2)  |
| H2S1 | 4e       | 0.2356     | 0.3554      | 0.6518      | 0.818(4) | 0.110     |
| H2S2 | 4e       | 0.0671     | 0.3257      | 0.5940      | 0.818(4) | 0.110     |
| H2S3 | 4e       | 0.2845     | 0.3052      | 0.6194      | 0.818(4) | 0.110     |
| O3S  | 4e       | 0.3738(5)  | 0.3660(1)   | 0.4040(4)   | 0.818(4) | 0.118(1)  |
| O4S  | 4e       | 0.2868(18) | 0.3487(5)   | 0.5247(13)  | 0.18     | 0.118(1)  |
| H3S  | 4e       | 0.360(10)  | 0.3905(6)   | 0.3601(15)  | 0.818(4) | 0.142     |
| H4S  | 4e       | 0.293(5)   | 0.3277(10)  | 0.470(2)    | 0.182(4) | 0.142     |
| H3T  | 4e       | 0.342(8)   | 0.3702(14)  | 0.4746(12)  | 0.818(4) | 0.142     |
| H4T  | 4e       | 0.164(3)   | 0.348(2)    | 0.560(3)    | 0.182(4) | 0.142     |

Table 2B. Bond distances (Å) in the crystal structure of **2**.

|             |            |             |          |
|-------------|------------|-------------|----------|
| Fe(1)–O(2)  | 2.0572(17) | N(1)–C(2)   | 1.332(3) |
| Fe(1)–O(3)  | 2.0935(17) | N(1)–C(8)   | 1.359(3) |
| Fe(1)–O(1)  | 2.1072(18) | N(2)–C(3)   | 1.331(3) |
| Fe(1)–O(4)  | 2.1192(17) | N(2)–C(9)   | 1.356(3) |
| Fe(1)–N(2)  | 2.211(2)   | N(3)–C(4)   | 1.318(3) |
| Fe(1)–N(1)  | 2.2517(19) | N(3)–C(10)  | 1.355(3) |
| Fe(2)–O(8)  | 2.0281(16) | N(4)–C(5)   | 1.332(3) |
| Fe(2)–O(5)  | 2.0883(19) | N(4)–C(11)  | 1.359(3) |
| Fe(2)–O(6)  | 2.1273(16) | N(5)–C(6)   | 1.327(3) |
| Fe(2)–O(7)  | 2.1370(16) | N(5)–C(12)  | 1.353(3) |
| Fe(2)–N(4)  | 2.2060(19) | N(6)–C(1)   | 1.332(3) |
| Fe(2)–N(3)  | 2.2243(19) | N(6)–C(7)   | 1.349(3) |
| S(1)–O(9)   | 1.4552(18) | C(1)–C(2)   | 1.401(3) |
| S(1)–O(8)   | 1.4809(16) | C(3)–C(4)   | 1.405(3) |
| S(1)–O(6)   | 1.4843(16) | C(5)–C(6)   | 1.405(3) |
| S(1)–O(7)   | 1.4861(17) | C(7)–C(8)   | 1.403(3) |
| S(2)–O(12B) | 1.386(15)  | C(7)–C(12)  | 1.464(3) |
| S(2)–O(11B) | 1.41(2)    | C(8)–C(9)   | 1.450(3) |
| S(2)–O(13A) | 1.464(2)   | C(9)–C(10)  | 1.383(3) |
| S(2)–O(10)  | 1.4717(18) | C(10)–C(11) | 1.454(3) |
| S(2)–O(11A) | 1.484(2)   | C(11)–C(12) | 1.395(3) |
| S(2)–O(12A) | 1.4873(19) | O(2S)–C(2S) | 1.398(6) |
| S(2)–O(13B) | 1.665(17)  |             |          |

Table 2C. Bond angles (°) in the crystal structure of **2**.

|                 |           |                 |            |
|-----------------|-----------|-----------------|------------|
| O(2)–Fe(1)–O(3) | 99.78(7)  | O(5)–Fe(2)–O(6) | 85.01(7)   |
| O(2)–Fe(1)–O(1) | 89.04(7)  | O(8)–Fe(2)–O(7) | 94.02(6)   |
| O(3)–Fe(1)–O(1) | 86.01(7)  | O(5)–Fe(2)–O(7) | 86.01(7)   |
| O(2)–Fe(1)–O(4) | 93.46(7)  | O(6)–Fe(2)–O(7) | 169.29(6)  |
| O(3)–Fe(1)–O(4) | 86.19(7)  | O(8)–Fe(2)–N(4) | 104.44(7)  |
| O(1)–Fe(1)–O(4) | 172.11(7) | O(5)–Fe(2)–N(4) | 163.86(7)  |
| O(2)–Fe(1)–N(2) | 166.58(7) | O(6)–Fe(2)–N(4) | 95.28(7)   |
| O(3)–Fe(1)–N(2) | 93.58(7)  | O(7)–Fe(2)–N(4) | 91.73(7)   |
| O(1)–Fe(1)–N(2) | 93.21(7)  | O(8)–Fe(2)–N(3) | 178.01(7)  |
| O(4)–Fe(1)–N(2) | 86.09(7)  | O(5)–Fe(2)–N(3) | 88.07(7)   |
| O(2)–Fe(1)–N(1) | 91.27(7)  | O(6)–Fe(2)–N(3) | 85.95(6)   |
| O(3)–Fe(1)–N(1) | 168.52(7) | O(7)–Fe(2)–N(3) | 87.92(6)   |
| O(1)–Fe(1)–N(1) | 97.38(7)  | N(4)–Fe(2)–N(3) | 75.87(7)   |
| O(4)–Fe(1)–N(1) | 90.05(7)  | O(9)–S(1)–O(8)  | 109.15(10) |
| N(2)–Fe(1)–N(1) | 75.33(7)  | O(9)–S(1)–O(6)  | 111.54(10) |
| O(8)–Fe(2)–O(5) | 91.66(7)  | O(8)–S(1)–O(6)  | 109.70(9)  |
| O(8)–Fe(2)–O(6) | 92.06(6)  | O(9)–S(1)–O(7)  | 111.76(10) |

|                    |            |                   |            |
|--------------------|------------|-------------------|------------|
| O(8)–S(1)–O(7)     | 108.72(9)  | C(4)–N(3)–C(10)   | 116.69(19) |
| O(6)–S(1)–O(7)     | 105.89(9)  | C(4)–N(3)–Fe(2)   | 129.62(15) |
| O(12B)–S(2)–O(11B) | 121.1(12)  | C(10)–N(3)–Fe(2)  | 113.50(14) |
| O(12B)–S(2)–O(13A) | 125.3(6)   | C(5)–N(4)–C(11)   | 116.09(19) |
| O(11B)–S(2)–O(13A) | 67.4(10)   | C(5)–N(4)–Fe(2)   | 129.27(15) |
| O(12B)–S(2)–O(10)  | 114.2(6)   | C(11)–N(4)–Fe(2)  | 114.62(14) |
| O(11B)–S(2)–O(10)  | 110.9(10)  | C(6)–N(5)–C(12)   | 116.3(2)   |
| O(13A)–S(2)–O(10)  | 109.73(11) | C(1)–N(6)–C(7)    | 116.0(2)   |
| O(12B)–S(2)–O(11A) | 84.0(7)    | N(6)–C(1)–C(2)    | 122.7(2)   |
| O(11B)–S(2)–O(11A) | 45.4(10)   | N(1)–C(2)–C(1)    | 121.9(2)   |
| O(13A)–S(2)–O(11A) | 110.05(11) | N(2)–C(3)–C(4)    | 121.1(2)   |
| O(10)–S(2)–O(11A)  | 109.90(11) | N(3)–C(4)–C(3)    | 122.3(2)   |
| O(12B)–S(2)–O(12A) | 24.5(7)    | N(4)–C(5)–C(6)    | 121.3(2)   |
| O(11B)–S(2)–O(12A) | 137.2(10)  | N(5)–C(6)–C(5)    | 123.0(2)   |
| O(13A)–S(2)–O(12A) | 109.42(11) | N(6)–C(7)–C(8)    | 121.6(2)   |
| O(10)–S(2)–O(12A)  | 109.95(10) | N(6)–C(7)–C(12)   | 119.5(2)   |
| O(11A)–S(2)–O(12A) | 107.77(11) | C(8)–C(7)–C(12)   | 118.98(19) |
| O(12B)–S(2)–O(13B) | 106.0(9)   | N(1)–C(8)–C(7)    | 121.8(2)   |
| O(11B)–S(2)–O(13B) | 97.3(11)   | N(1)–C(8)–C(9)    | 117.6(2)   |
| O(13A)–S(2)–O(13B) | 30.3(6)    | C(7)–C(8)–C(9)    | 120.6(2)   |
| O(10)–S(2)–O(13B)  | 104.3(6)   | N(2)–C(9)–C(10)   | 121.4(2)   |
| O(11A)–S(2)–O(13B) | 136.3(6)   | N(2)–C(9)–C(8)    | 118.5(2)   |
| O(12A)–S(2)–O(13B) | 84.4(6)    | C(10)–C(9)–C(8)   | 120.1(2)   |
| S(1)–O(6)–Fe(2)    | 140.39(10) | N(3)–C(10)–C(9)   | 121.5(2)   |
| S(1)–O(7)–Fe(2)    | 129.93(10) | N(3)–C(10)–C(11)  | 118.47(19) |
| S(1)–O(8)–Fe(2)    | 136.65(10) | C(9)–C(10)–C(11)  | 120.0(2)   |
| C(2)–N(1)–C(8)     | 115.9(2)   | N(4)–C(11)–C(12)  | 122.3(2)   |
| C(2)–N(1)–Fe(1)    | 130.61(16) | N(4)–C(11)–C(10)  | 117.31(19) |
| C(8)–N(1)–Fe(1)    | 113.05(14) | C(12)–C(11)–C(10) | 120.4(2)   |
| C(3)–N(2)–C(9)     | 116.9(2)   | N(5)–C(12)–C(11)  | 121.1(2)   |
| C(3)–N(2)–Fe(1)    | 128.34(16) | N(5)–C(12)–C(7)   | 119.1(2)   |
| C(9)–N(2)–Fe(1)    | 113.94(15) | C(11)–C(12)–C(7)  | 119.8(2)   |

Table 3A. Positional and thermal parameters for **3**.

| Atom  | Position   | <i>x/a</i> | <i>y/b</i> | <i>z/c</i> | S.o.f. | <i>U</i> <sub>eq</sub> |
|-------|------------|------------|------------|------------|--------|------------------------|
| Fe(1) | 4 <i>e</i> | 0.04906(8) | 0.32414(2) | 0.88263(4) | 1      | 0.0107(2)              |
| Fe(2) | 4 <i>e</i> | 0.25412(8) | 0.54698(2) | 0.58968(4) | 1      | 0.0097(1)              |
| S(1)  | 4 <i>e</i> | -0.4914(1) | 0.27349(3) | 0.59910(6) | 1      | 0.0113(2)              |
| S(2)  | 4 <i>e</i> | -0.2544(1) | 0.52086(3) | 0.61088(6) | 1      | 0.0104(2)              |
| O(1)  | 4 <i>e</i> | -0.7138(4) | 0.2817(1)  | 0.5793(2)  | 1      | 0.0163(7)              |
| O(2)  | 4 <i>e</i> | -0.4110(4) | 0.23370(9) | 0.5328(2)  | 1      | 0.0142(6)              |
| O(3)  | 4 <i>e</i> | -0.3770(4) | 0.3232(1)  | 0.5876(2)  | 1      | 0.0202(7)              |
| O(4)  | 4 <i>e</i> | -0.4636(4) | 0.2544(1)  | 0.6975(2)  | 1      | 0.0159(7)              |

| Atom   | Position | $x/a$      | $y/b$      | $z/c$     | S.o.f. | $U_{eq}$  |
|--------|----------|------------|------------|-----------|--------|-----------|
| O(5)   | 4e       | -0.3060(4) | 0.49892(9) | 0.7021(2) | 1      | 0.0136(6) |
| O(6)   | 4e       | -0.0683(4) | 0.55416(9) | 0.6188(2) | 1      | 0.0159(7) |
| O(7)   | 4e       | -0.2149(4) | 0.47725(9) | 0.5449(2) | 1      | 0.0166(7) |
| O(8)   | 4e       | -0.4234(4) | 0.55538(9) | 0.5734(2) | 1      | 0.0154(7) |
| O(9)   | 4e       | 0.2222(4)  | 0.62920(9) | 0.5666(2) | 1      | 0.0149(6) |
| O(10)  | 4e       | -0.0083(4) | 0.2838(1)  | 1.0047(2) | 1      | 0.0188(7) |
| O(11)  | 4e       | -0.2442(4) | 0.3610(1)  | 0.8920(2) | 1      | 0.0162(7) |
| O(12)  | 4e       | -0.0675(4) | 0.27293(9) | 0.7797(2) | 1      | 0.0172(7) |
| O(13)  | 4e       | 0.3437(4)  | 0.2881(1)  | 0.8704(2) | 1      | 0.0167(7) |
| O(1S)  | 4e       | -0.3940(4) | 0.39502(9) | 0.7312(2) | 1      | 0.0167(7) |
| O(2S)  | 4e       | 0.1794(4)  | 0.31047(9) | 1.2366(2) | 1      | 0.0197(7) |
| O(3S)  | 4e       | -0.7981(4) | 0.3424(1)  | 0.4229(2) | 1      | 0.0214(7) |
| N(1)   | 4e       | 0.1687(4)  | 0.3933(1)  | 0.9680(2) | 1      | 0.0094(7) |
| N(2)   | 4e       | 0.1316(4)  | 0.3845(1)  | 0.7781(2) | 1      | 0.0095(8) |
| N(3)   | 4e       | 0.2221(4)  | 0.4707(1)  | 0.6624(2) | 1      | 0.0079(7) |
| N(4)   | 4e       | 0.2946(4)  | 0.5665(1)  | 0.7409(2) | 1      | 0.0107(8) |
| N(5)   | 4e       | 0.3107(5)  | 0.5799(1)  | 0.9366(2) | 1      | 0.0154(8) |
| N(6)   | 4e       | 0.2510(4)  | 0.4912(1)  | 1.0528(2) | 1      | 0.0124(8) |
| C(1)   | 4e       | 0.2175(5)  | 0.4481(1)  | 1.1027(3) | 1      | 0.014(1)  |
| H(1)   | 4e       | 0.2209     | 0.4504     | 1.1681    | 1      | 0.016     |
| C(2)   | 4e       | 0.1770(5)  | 0.3997(1)  | 1.0608(2) | 1      | 0.0113(9) |
| H(2)   | 4e       | 0.1556     | 0.3699     | 1.0991    | 1      | 0.014     |
| C(3)   | 4e       | 0.1211(5)  | 0.3815(1)  | 0.6851(3) | 1      | 0.0120(9) |
| H(3)   | 4e       | 0.0799     | 0.3500     | 0.6573    | 1      | 0.014     |
| C(4)   | 4e       | 0.1698(5)  | 0.4244(1)  | 0.6269(3) | 1      | 0.0108(9) |
| H(4)   | 4e       | 0.1653     | 0.4200     | 0.5618    | 1      | 0.013     |
| C(5)   | 4e       | 0.3276(5)  | 0.6133(1)  | 0.7798(3) | 1      | 0.013(1)  |
| H(5)   | 4e       | 0.3463     | 0.6425     | 0.7414    | 1      | 0.015     |
| C(6)   | 4e       | 0.3346(5)  | 0.6192(1)  | 0.8774(3) | 1      | 0.0123(9) |
| H(6)   | 4e       | 0.3575     | 0.6527     | 0.9020    | 1      | 0.015     |
| C(7)   | 4e       | 0.2463(5)  | 0.4859(1)  | 0.9581(3) | 1      | 0.0111(9) |
| C(8)   | 4e       | 0.2030(5)  | 0.4374(1)  | 0.9160(2) | 1      | 0.0092(8) |
| C(9)   | 4e       | 0.1889(5)  | 0.4318(1)  | 0.8149(3) | 1      | 0.0099(9) |
| C(10)  | 4e       | 0.2282(5)  | 0.4749(1)  | 0.7581(2) | 1      | 0.0084(8) |
| C(11)  | 4e       | 0.2703(5)  | 0.5256(1)  | 0.7996(2) | 1      | 0.0096(8) |
| C(12)  | 4e       | 0.2757(5)  | 0.5318(1)  | 0.8975(3) | 1      | 0.0118(9) |
| H(9A)  | 4e       | 0.286(3)   | 0.647(1)   | 0.517(1)  | 1      | 0.014     |
| H(10A) | 4e       | 0.082(2)   | 0.2613(9)  | 1.033(2)  | 1      | 0.014     |
| H(11A) | 4e       | -0.284(5)  | 0.375(1)   | 0.8356(9) | 1      | 0.014     |
| H(12A) | 4e       | 0.019(2)   | 0.2463(8)  | 0.763(2)  | 1      | 0.014     |
| H(13A) | 4e       | 0.403(4)   | 0.283(1)   | 0.8129(8) | 1      | 0.014     |
| H(9B)  | 4e       | 0.088(2)   | 0.640(1)   | 0.575(1)  | 1      | 0.014     |
| H(10B) | 4e       | -0.144(2)  | 0.279(1)   | 1.019(2)  | 1      | 0.014     |
| H(11B) | 4e       | -0.245(5)  | 0.3845(8)  | 0.941(1)  | 1      | 0.014     |
| H(12B) | 4e       | -0.198(2)  | 0.270(1)   | 0.755(2)  | 1      | 0.014     |

| Atom   | Position | $x/a$     | $y/b$     | $z/c$    | S.o.f. | $U_{eq}$ |
|--------|----------|-----------|-----------|----------|--------|----------|
| H(13B) | 4e       | 0.428(3)  | 0.283(1)  | 0.921(1) | 1      | 0.014    |
| H(1S)  | 4e       | -0.380(5) | 0.3727(6) | 0.682(1) | 1      | 0.014    |
| H(2S)  | 4e       | -0.355(5) | 0.4288(5) | 0.722(2) | 1      | 0.014    |
| H(3S)  | 4e       | 0.285(3)  | 0.2877(8) | 1.221(2) | 1      | 0.014    |
| H(4S)  | 4e       | 0.201(4)  | 0.3241(9) | 1.296(1) | 1      | 0.014    |
| H(5S)  | 4e       | -0.733(4) | 0.3736(5) | 0.420(2) | 1      | 0.014    |
| H(6S)  | 4e       | -0.762(5) | 0.3226(7) | 0.475(1) | 1      | 0.014    |

Table 3B. Bond distances ( $\text{\AA}$ ) in the crystal structure of **3**.

|             |          |             |          |
|-------------|----------|-------------|----------|
| Fe(1)–O(10) | 2.050(3) | N(1)–C(8)   | 1.361(4) |
| Fe(1)–O(12) | 2.086(2) | N(2)–C(3)   | 1.321(5) |
| Fe(1)–O(11) | 2.116(3) | N(2)–C(9)   | 1.358(4) |
| Fe(1)–O(13) | 2.119(3) | N(3)–C(4)   | 1.322(4) |
| Fe(1)–N(2)  | 2.205(3) | N(3)–C(10)  | 1.361(4) |
| Fe(1)–N(1)  | 2.261(3) | N(4)–C(5)   | 1.325(4) |
| Fe(2)–O(7)  | 2.018(2) | N(4)–C(11)  | 1.342(4) |
| Fe(2)–O(8)  | 2.107(2) | N(5)–C(6)   | 1.315(5) |
| Fe(2)–O(9)  | 2.122(2) | N(5)–C(12)  | 1.357(5) |
| Fe(2)–O(6)  | 2.134(2) | N(6)–C(1)   | 1.323(5) |
| Fe(2)–N(3)  | 2.205(3) | N(6)–C(7)   | 1.350(5) |
| Fe(2)–N(4)  | 2.212(3) | C(1)–C(2)   | 1.402(5) |
| S(1)–O(1)   | 1.472(3) | C(3)–C(4)   | 1.404(5) |
| S(1)–O(3)   | 1.472(3) | C(5)–C(6)   | 1.392(5) |
| S(1)–O(2)   | 1.479(2) | C(7)–C(8)   | 1.394(5) |
| S(1)–O(4)   | 1.485(3) | C(7)–C(12)  | 1.463(5) |
| S(2)–O(5)   | 1.453(2) | C(8)–C(9)   | 1.442(5) |
| S(2)–O(6)   | 1.471(2) | C(9)–C(10)  | 1.383(5) |
| S(2)–O(7)   | 1.474(3) | C(10)–C(11) | 1.441(5) |
| S(2)–O(8)   | 1.490(3) | C(11)–C(12) | 1.398(5) |
| N(1)–C(2)   | 1.325(4) |             |          |

Table 3C. Bond angles ( $^\circ$ ) in the crystal structure of **3**.

|                   |            |                  |            |
|-------------------|------------|------------------|------------|
| O(10)–Fe(1)–O(12) | 102.23(10) | O(11)–Fe(1)–N(2) | 87.77(10)  |
| O(10)–Fe(1)–O(11) | 89.62(10)  | O(13)–Fe(1)–N(2) | 91.05(10)  |
| O(12)–Fe(1)–O(11) | 90.43(10)  | O(10)–Fe(1)–N(1) | 90.01(10)  |
| O(10)–Fe(1)–O(13) | 91.62(10)  | O(12)–Fe(1)–N(1) | 167.06(10) |
| O(12)–Fe(1)–O(13) | 89.25(10)  | O(11)–Fe(1)–N(1) | 85.43(10)  |
| O(11)–Fe(1)–O(13) | 178.76(10) | O(13)–Fe(1)–N(1) | 94.62(10)  |
| O(10)–Fe(1)–N(2)  | 164.64(11) | N(2)–Fe(1)–N(1)  | 74.69(10)  |
| O(12)–Fe(1)–N(2)  | 92.93(10)  | O(7)–Fe(2)–O(8)  | 92.06(10)  |

|                 |            |                   |          |
|-----------------|------------|-------------------|----------|
| O(7)–Fe(2)–O(9) | 98.26(10)  | C(9)–N(2)–Fe(1)   | 115.1(2) |
| O(8)–Fe(2)–O(9) | 88.69(9)   | C(4)–N(3)–C(10)   | 116.8(3) |
| O(7)–Fe(2)–O(6) | 95.84(10)  | C(4)–N(3)–Fe(2)   | 129.0(2) |
| O(8)–Fe(2)–O(6) | 168.23(10) | C(10)–N(3)–Fe(2)  | 113.4(2) |
| O(9)–Fe(2)–O(6) | 81.57(9)   | C(5)–N(4)–C(11)   | 117.0(3) |
| O(7)–Fe(2)–N(3) | 99.43(10)  | C(5)–N(4)–Fe(2)   | 128.3(2) |
| O(8)–Fe(2)–N(3) | 103.90(10) | C(11)–N(4)–Fe(2)  | 114.5(2) |
| O(9)–Fe(2)–N(3) | 157.83(10) | C(6)–N(5)–C(12)   | 116.2(3) |
| O(6)–Fe(2)–N(3) | 83.42(10)  | C(1)–N(6)–C(7)    | 116.6(3) |
| O(7)–Fe(2)–N(4) | 175.16(10) | N(6)–C(1)–C(2)    | 122.6(3) |
| O(8)–Fe(2)–N(4) | 88.99(10)  | N(1)–C(2)–C(1)    | 121.6(3) |
| O(9)–Fe(2)–N(4) | 86.49(10)  | N(2)–C(3)–C(4)    | 122.3(3) |
| O(6)–Fe(2)–N(4) | 83.87(10)  | N(3)–C(4)–C(3)    | 121.6(3) |
| N(3)–Fe(2)–N(4) | 75.74(10)  | N(4)–C(5)–C(6)    | 120.9(3) |
| O(1)–S(1)–O(3)  | 110.26(15) | N(5)–C(6)–C(5)    | 123.4(3) |
| O(1)–S(1)–O(2)  | 109.04(14) | N(6)–C(7)–C(8)    | 121.1(3) |
| O(3)–S(1)–O(2)  | 109.45(15) | N(6)–C(7)–C(12)   | 120.2(3) |
| O(1)–S(1)–O(4)  | 109.12(15) | C(8)–C(7)–C(12)   | 118.7(3) |
| O(3)–S(1)–O(4)  | 109.38(15) | N(1)–C(8)–C(7)    | 121.8(3) |
| O(2)–S(1)–O(4)  | 109.58(14) | N(1)–C(8)–C(9)    | 116.7(3) |
| O(5)–S(2)–O(6)  | 110.57(15) | C(7)–C(8)–C(9)    | 121.4(3) |
| O(5)–S(2)–O(7)  | 108.78(14) | N(2)–C(9)–C(10)   | 121.7(3) |
| O(6)–S(2)–O(7)  | 109.31(15) | N(2)–C(9)–C(8)    | 118.8(3) |
| O(5)–S(2)–O(8)  | 111.47(14) | C(10)–C(9)–C(8)   | 119.5(3) |
| O(6)–S(2)–O(8)  | 106.27(14) | N(3)–C(10)–C(9)   | 121.1(3) |
| O(7)–S(2)–O(8)  | 110.41(15) | N(3)–C(10)–C(11)  | 118.5(3) |
| S(2)–O(6)–Fe(2) | 137.08(15) | C(9)–C(10)–C(11)  | 120.3(3) |
| S(2)–O(7)–Fe(2) | 144.01(16) | N(4)–C(11)–C(12)  | 121.9(3) |
| S(2)–O(8)–Fe(2) | 128.26(15) | N(4)–C(11)–C(10)  | 117.5(3) |
| C(2)–N(1)–C(8)  | 116.3(3)   | C(12)–C(11)–C(10) | 120.5(3) |
| C(2)–N(1)–Fe(1) | 128.7(2)   | N(5)–C(12)–C(11)  | 120.6(3) |
| C(8)–N(1)–Fe(1) | 113.9(2)   | N(5)–C(12)–C(7)   | 120.0(3) |
| C(3)–N(2)–C(9)  | 116.4(3)   | C(11)–C(12)–C(7)  | 119.5(3) |
| C(3)–N(2)–Fe(1) | 128.5(2)   |                   |          |

Table 4A. Positional and thermal parameters for **4**.

| Atom  | Position   | <i>x/a</i> | <i>y/b</i> | <i>z/c</i> | S.o.f. | <i>U</i> <sub>eq</sub> |
|-------|------------|------------|------------|------------|--------|------------------------|
| Fe(1) | 4 <i>e</i> | 0.91680(9) | 0.92497(5) | 0.46225(4) | 1      | 0.0152(2)              |
| Fe(2) | 4 <i>e</i> | 1.3460(1)  | 0.56768(5) | 0.30709(5) | 1      | 0.0224(2)              |
| Fe(3) | 4 <i>e</i> | 1.5173(1)  | 1.01636(5) | 0.09411(5) | 1      | 0.0169(2)              |
| Cl(1) | 4 <i>e</i> | 0.8366(2)  | 1.07683(8) | 0.46607(8) | 1      | 0.0183(3)              |
| Cl(2) | 4 <i>e</i> | 0.7516(2)  | 0.8430(1)  | 0.57621(9) | 1      | 0.0296(4)              |
| Cl(3) | 4 <i>e</i> | 1.2098(2)  | 0.45040(9) | 0.3990(1)  | 1      | 0.0315(4)              |



| Atom   | Position | <i>x/a</i> | <i>y/b</i> | <i>z/c</i> | S.o.f.    | <i>U</i> <sub>eq</sub> |
|--------|----------|------------|------------|------------|-----------|------------------------|
| Cl(4)  | 4e       | 1.5049(2)  | 1.16979(9) | 0.06628(9) | 1         | 0.0285(3)              |
| Cl(5)  | 4e       | 1.2808(2)  | 1.01698(9) | 0.01625(8) | 1         | 0.0197(3)              |
| Cl(6)  | 4e       | 0.7827(2)  | 0.8092(1)  | 0.28397(9) | 1         | 0.0296(3)              |
| O(1)   | 4e       | 0.7345(5)  | 0.9416(3)  | 0.3818(2)  | 1         | 0.0243(9)              |
| H(1A)  | 4e       | 0.7468     | 0.9054     | 0.3565     | 1         | 0.037                  |
| O(2)   | 4e       | 1.1775(8)  | 0.5918(4)  | 0.2184(3)  | 0.645(10) | 0.052(2)               |
| H(2A)  | 4e       | 1.1443     | 0.6397     | 0.1888     | 1         | 0.079                  |
| O(2A)  | 4e       | 1.1775(8)  | 0.5918(4)  | 0.2184(3)  | 0.355(10) | 0.052(2)               |
| H(2B)  | 4e       | 1.2012     | 0.6214     | 0.2450     | 0.355(10) | 0.079                  |
| O(3)   | 4e       | 1.5365(6)  | 0.5636(4)  | 0.3824(3)  | 0.823(10) | 0.049(2)               |
| O(3A)  | 4e       | 1.5365(6)  | 0.5636(4)  | 0.3824(3)  | 0.18      | 0.049(2)               |
| O(4)   | 4e       | 1.5423(8)  | 0.5012(3)  | 0.2312(4)  | 1         | 0.052(2)               |
| O(5)   | 4e       | 1.7152(5)  | 0.9936(3)  | 0.1689(2)  | 1         | 0.0254(9)              |
| H(5A)  | 4e       | 1.7343     | 0.9427     | 0.1963     | 1         | 0.038                  |
| N(1)   | 4e       | 1.0937(6)  | 0.9723(3)  | 0.3468(3)  | 1         | 0.0157(9)              |
| N(2)   | 4e       | 1.0311(5)  | 0.8044(3)  | 0.4282(3)  | 1         | 0.0152(9)              |
| N(3)   | 4e       | 1.1946(6)  | 0.6655(3)  | 0.3662(3)  | 1         | 0.021(1)               |
| N(4)   | 4e       | 1.4316(6)  | 0.6985(3)  | 0.2304(3)  | 1         | 0.020(1)               |
| N(5)   | 4e       | 1.4974(6)  | 0.8716(3)  | 0.1478(3)  | 1         | 0.0159(9)              |
| N(6)   | 4e       | 1.3289(6)  | 1.0070(3)  | 0.2040(3)  | 1         | 0.016(1)               |
| C(1)   | 4e       | 0.9992(7)  | 0.7219(4)  | 0.4630(3)  | 1         | 0.022(1)               |
| H(1)   | 4e       | 0.9210     | 0.7094     | 0.5098     | 1         | 0.026                  |
| C(2)   | 4e       | 1.0793(7)  | 0.6530(4)  | 0.4316(3)  | 1         | 0.022(1)               |
| H(2)   | 4e       | 1.0505     | 0.5966     | 0.4575     | 1         | 0.026                  |
| C(3)   | 4e       | 1.5439(7)  | 0.7169(4)  | 0.1645(3)  | 1         | 0.023(1)               |
| H(3)   | 4e       | 1.6034     | 0.6712     | 0.1454     | 1         | 0.028                  |
| C(4)   | 4e       | 1.5772(7)  | 0.8047(4)  | 0.1215(3)  | 1         | 0.020(1)               |
| H(4)   | 4e       | 1.6554     | 0.8151     | 0.0746     | 1         | 0.024                  |
| C(5)   | 4e       | 1.2444(7)  | 1.0704(3)  | 0.2339(3)  | 1         | 0.017(1)               |
| H(5)   | 4e       | 1.2642     | 1.1281     | 0.2072     | 1         | 0.020                  |
| C(6)   | 4e       | 1.1250(7)  | 1.0531(4)  | 0.3051(3)  | 1         | 0.019(1)               |
| H(6)   | 4e       | 1.0669     | 1.0998     | 0.3231     | 1         | 0.023                  |
| C(7)   | 4e       | 1.1464(6)  | 0.8182(3)  | 0.3601(3)  | 1         | 0.015(1)               |
| C(8)   | 4e       | 1.2285(7)  | 0.7494(3)  | 0.3289(3)  | 1         | 0.017(1)               |
| C(9)   | 4e       | 1.3509(7)  | 0.7664(4)  | 0.2570(3)  | 1         | 0.018(1)               |
| C(10)  | 4e       | 1.3831(7)  | 0.8530(4)  | 0.2164(3)  | 1         | 0.017(1)               |
| C(11)  | 4e       | 1.2967(7)  | 0.9239(3)  | 0.2461(3)  | 1         | 0.015(1)               |
| C(12)  | 4e       | 1.1787(6)  | 0.9071(3)  | 0.3171(3)  | 1         | 0.013(1)               |
| C(13)  | 4e       | 0.5583(8)  | 0.9718(6)  | 0.3956(5)  | 1         | 0.046(2)               |
| H(13A) | 4e       | 0.4983     | 0.9245     | 0.4311     | 1         | 0.068                  |
| H(13B) | 4e       | 0.5124     | 0.9927     | 0.3451     | 1         | 0.068                  |
| H(13C) | 4e       | 0.5449     | 1.0186     | 0.4201     | 1         | 0.068                  |
| C(14)  | 4e       | 0.996(3)   | 0.584(2)   | 0.235(2)   | 0.355(10) | 0.061(3)               |
| H(14A) | 4e       | 0.9424     | 0.6170     | 0.1878     | 0.355(10) | 0.091                  |
| H(14B) | 4e       | 0.9461     | 0.6073     | 0.2793     | 0.355(10) | 0.091                  |

| Atom   | Position | $x/a$     | $y/b$     | $z/c$     | S.o.f.    | $U_{eq}$ |
|--------|----------|-----------|-----------|-----------|-----------|----------|
| H(14C) | 4e       | 0.9777    | 0.5238    | 0.2484    | 0.355(10) | 0.091    |
| C(15)  | 4e       | 1.106(2)  | 0.5227(9) | 0.2004(8) | 0.645(10) | 0.061(3) |
| H(15A) | 4e       | 1.1621    | 0.5151    | 0.1496    | 0.645(10) | 0.091    |
| H(15B) | 4e       | 0.9856    | 0.5391    | 0.1975    | 0.645(10) | 0.091    |
| H(15C) | 4e       | 1.1229    | 0.4688    | 0.2424    | 0.645(10) | 0.091    |
| C(16)  | 4e       | 1.644(5)  | 0.490(3)  | 0.417(2)  | 0.177(10) | 0.060(3) |
| H(16A) | 4e       | 1.7609    | 0.5015    | 0.4007    | 0.177(10) | 0.090    |
| H(16B) | 4e       | 1.6263    | 0.4415    | 0.3988    | 0.177(10) | 0.090    |
| H(16C) | 4e       | 1.6189    | 0.4749    | 0.4746    | 0.177(10) | 0.090    |
| C(17)  | 4e       | 1.711(1)  | 0.5601(7) | 0.3694(7) | 0.823(10) | 0.060(3) |
| H(17A) | 4e       | 1.7601    | 0.5061    | 0.3579    | 0.823(10) | 0.090    |
| H(17B) | 4e       | 1.7518    | 0.5632    | 0.4169    | 0.823(10) | 0.090    |
| H(17C) | 4e       | 1.7446    | 0.6086    | 0.3244    | 0.823(10) | 0.090    |
| C(18)  | 4e       | 1.8711(8) | 1.0330(5) | 0.1450(4) | 1         | 0.040(2) |
| H(18A) | 4e       | 1.9455    | 1.0062    | 0.1077    | 1         | 0.060    |
| H(18B) | 4e       | 1.9261    | 1.0247    | 0.1918    | 1         | 0.060    |
| H(18C) | 4e       | 1.8466    | 1.0946    | 0.1194    | 1         | 0.060    |
| H(19A) | 4e       | 1.557(17) | 0.441(2)  | 0.260(5)  | 1         | 0.163    |
| H(19B) | 4e       | 1.535(16) | 0.498(6)  | 0.179(3)  | 1         | 0.163    |
| O(1S)  | 4e       | 1.900(2)  | 0.315(1)  | 0.334(1)  | 0.50      | 0.129(8) |
| H(1S)  | 4e       | 1.9522    | 0.3369    | 0.2897    | 0.50      | 0.194    |
| O(2S)  | 4e       | 1.551(1)  | 0.3638(5) | 0.4947(5) | 1         | 0.103(3) |
| H(2S)  | 4e       | 1.5186    | 0.3820    | 0.5343    | 1         | 0.154    |
| O(3S)  | 4e       | 0.017(1)  | 0.7415(5) | 0.1528(4) | 1         | 0.097(3) |
| H(3S)  | 4e       | -0.0542   | 0.7612    | 0.1845    | 1         | 0.145    |
| O(4S)  | 4e       | 1.519(4)  | 0.558(2)  | 0.074(2)  | 0.25      | 0.088(9) |
| O(4Q)  | 4e       | 1.278(5)  | 0.566(3)  | -0.007(3) | 0.25      | 0.15(2)  |
| H(4S)  | 4e       | 1.6162    | 0.5662    | 0.0513    | 0.25      | 0.132    |
| O(5S)  | 4e       | 1.541(2)  | 0.252(1)  | 0.297(1)  | 0.25      | 0.042(5) |
| H(5S)  | 4e       | 1.5940    | 0.2610    | 0.3287    | 0.25      | 0.063    |
| O(5Q)  | 4e       | 1.677(3)  | 0.229(2)  | 0.186(1)  | 0.25      | 0.072(7) |
| H(5Q)  | 4e       | 1.7752    | 0.2425    | 0.1788    | 0.25      | 0.108    |
| O(6S)  | 4e       | 0.959(4)  | 0.685(2)  | -0.145(2) | 0.25      | 0.081(6) |
| H(6S)  | 4e       | 0.8602    | 0.6742    | -0.1366   | 0.25      | 0.122    |
| O(7S)  | 4e       | 0.849(4)  | 0.600(2)  | 0.015(2)  | 0.25      | 0.081(6) |
| H(7S)  | 4e       | 0.8836    | 0.5832    | 0.0592    | 0.25      | 0.122    |
| O(3W)  | 4e       | 0.612(3)  | 0.355(2)  | 0.203(2)  | 0.119(12) | 0.003(8) |
| C(1S)  | 4e       | 1.716(2)  | 0.356(1)  | 0.337(2)  | 0.50      | 0.088(8) |
| H(1S1) | 4e       | 1.6501    | 0.3232    | 0.3852    | 0.50      | 0.131    |
| H(1S2) | 4e       | 1.6700    | 0.3550    | 0.2904    | 0.50      | 0.131    |
| H(1S3) | 4e       | 1.7106    | 0.4153    | 0.3386    | 0.50      | 0.131    |
| C(2S)  | 4e       | 1.508(1)  | 0.2745(5) | 0.5129(6) | 1         | 0.059(2) |
| H(2S1) | 4e       | 1.6077    | 0.2372    | 0.4992    | 1         | 0.089    |
| H(2S2) | 4e       | 1.4199    | 0.2744    | 0.4819    | 1         | 0.089    |
| H(2S3) | 4e       | 1.4679    | 0.2532    | 0.5695    | 1         | 0.089    |

| Atom  | Position | <i>x/a</i> | <i>y/b</i> | <i>z/c</i> | S.o.f. | <i>U</i> <sub>eq</sub> |
|-------|----------|------------|------------|------------|--------|------------------------|
| C(3S) | 4e       | 0.077(1)   | 0.8114(6)  | 0.0879(5)  | 1      | 0.058(2)               |
| C(4S) | 4e       | 1.394(3)   | 0.608(2)   | 0.019(2)   | 0.25   | 0.096(7)               |
| C(4Q) | 4e       | 1.394(3)   | 0.608(2)   | 0.019(2)   | 0.25   | 0.096(7)               |
| C(5S) | 4e       | 1.637(2)   | 0.182(1)   | 0.2652(9)  | 0.25   | 0.053(4)               |
| C(5Q) | 4e       | 1.637(2)   | 0.182(1)   | 0.2652(9)  | 0.25   | 0.053(4)               |
| C(6S) | 4e       | 0.987(5)   | 0.726(3)   | -0.088(3)  | 0.25   | 0.11(2)                |
| C(7S) | 4e       | 0.902(5)   | 0.685(2)   | -0.028(3)  | 0.25   | 0.11(2)                |

Table 4B. Bond distances (Å) in the crystal structure of **4**.

|             |            |             |           |
|-------------|------------|-------------|-----------|
| Fe(1)–N(2)  | 2.217(4)   | O(6S)–C(6S) | 1.413(19) |
| Fe(1)–N(1)  | 2.256(4)   | O(7S)–C(7S) | 1.435(19) |
| Fe(1)–Cl(2) | 2.3483(16) | N(1)–C(6)   | 1.325(7)  |
| Fe(1)–Cl(1) | 2.4475(15) | N(1)–C(12)  | 1.347(7)  |
| Fe(1)–Cl(1) | 2.5044(15) | N(2)–C(1)   | 1.330(7)  |
| Fe(2)–N(3)  | 2.231(5)   | N(2)–C(7)   | 1.358(7)  |
| Fe(2)–O(4)  | 2.233(6)   | N(3)–C(2)   | 1.324(7)  |
| Fe(2)–N(4)  | 2.267(5)   | N(3)–C(8)   | 1.358(7)  |
| Fe(2)–Cl(3) | 2.3559(16) | N(4)–C(3)   | 1.320(7)  |
| Fe(3)–N(6)  | 2.210(4)   | N(4)–C(9)   | 1.346(7)  |
| Fe(3)–N(5)  | 2.255(4)   | N(5)–C(4)   | 1.328(7)  |
| Fe(3)–Cl(4) | 2.3597(17) | N(5)–C(10)  | 1.362(7)  |
| Fe(3)–Cl(5) | 2.4302(15) | N(6)–C(5)   | 1.326(7)  |
| Fe(3)–Cl(5) | 2.5108(15) | N(6)–C(11)  | 1.359(7)  |
| O(1)–C(13)  | 1.418(7)   | C(1)–C(2)   | 1.404(8)  |
| O(2)–C(15)  | 1.467(14)  | C(3)–C(4)   | 1.429(8)  |
| O(3)–C(17)  | 1.371(11)  | C(5)–C(6)   | 1.417(8)  |
| O(5)–C(18)  | 1.429(7)   | C(7)–C(8)   | 1.405(7)  |
| O(4Q)–C(4Q) | 1.429(19)  | C(7)–C(12)  | 1.443(7)  |
| O(5Q)–C(5Q) | 1.378(17)  | C(8)–C(9)   | 1.438(7)  |
| O(1S)–C(1S) | 1.510(16)  | C(9)–C(10)  | 1.402(8)  |
| O(2S)–C(2S) | 1.462(10)  | C(10)–C(11) | 1.428(8)  |
| O(3S)–C(3S) | 1.411(10)  | C(11)–C(12) | 1.407(7)  |

Table 4C. Bond angles (°) in the crystal structure of **4**.

|                   |            |                   |            |
|-------------------|------------|-------------------|------------|
| N(2)–Fe(1)–N(1)   | 75.13(16)  | N(2)–Fe(1)–Cl(1)  | 92.66(12)  |
| N(2)–Fe(1)–Cl(2)  | 91.13(12)  | N(1)–Fe(1)–Cl(1)  | 86.09(12)  |
| N(1)–Fe(1)–Cl(2)  | 166.21(13) | Cl(2)–Fe(1)–Cl(1) | 95.86(6)   |
| N(2)–Fe(1)–Cl(1)  | 164.63(12) | Cl(1)–Fe(1)–Cl(1) | 86.72(5)   |
| N(1)–Fe(1)–Cl(1)  | 89.51(12)  | N(3)–Fe(2)–O(4)   | 163.65(18) |
| Cl(2)–Fe(1)–Cl(1) | 104.21(6)  | N(3)–Fe(2)–N(4)   | 75.16(16)  |

|                   |            |                   |          |
|-------------------|------------|-------------------|----------|
| O(4)–Fe(2)–N(4)   | 89.15(17)  | C(4)–N(5)–Fe(3)   | 129.5(4) |
| N(3)–Fe(2)–Cl(3)  | 92.85(12)  | C(10)–N(5)–Fe(3)  | 113.1(3) |
| O(4)–Fe(2)–Cl(3)  | 103.01(13) | C(5)–N(6)–C(11)   | 116.4(4) |
| N(4)–Fe(2)–Cl(3)  | 167.73(13) | C(5)–N(6)–Fe(3)   | 129.2(4) |
| N(6)–Fe(3)–N(5)   | 75.35(16)  | C(11)–N(6)–Fe(3)  | 114.4(3) |
| N(6)–Fe(3)–Cl(4)  | 92.09(13)  | N(2)–C(1)–C(2)    | 122.3(5) |
| N(5)–Fe(3)–Cl(4)  | 167.12(12) | N(3)–C(2)–C(1)    | 122.2(5) |
| N(6)–Fe(3)–Cl(5)  | 163.98(13) | N(4)–C(3)–C(4)    | 122.3(5) |
| N(5)–Fe(3)–Cl(5)  | 88.69(12)  | N(5)–C(4)–C(3)    | 120.5(5) |
| Cl(4)–Fe(3)–Cl(5) | 103.92(6)  | N(6)–C(5)–C(6)    | 122.1(5) |
| N(6)–Fe(3)–Cl(5)  | 89.41(12)  | N(1)–C(6)–C(5)    | 121.9(5) |
| N(5)–Fe(3)–Cl(5)  | 85.86(12)  | N(2)–C(7)–C(8)    | 122.1(5) |
| Cl(4)–Fe(3)–Cl(5) | 97.03(6)   | N(2)–C(7)–C(12)   | 118.4(5) |
| Cl(5)–Fe(3)–Cl(5) | 87.94(5)   | C(8)–C(7)–C(12)   | 119.5(5) |
| Fe(1)–Cl(1)–Fe(1) | 93.28(5)   | N(3)–C(8)–C(7)    | 120.7(5) |
| Fe(3)–Cl(5)–Fe(3) | 92.06(5)   | N(3)–C(8)–C(9)    | 118.8(5) |
| C(6)–N(1)–C(12)   | 116.6(5)   | C(7)–C(8)–C(9)    | 120.5(5) |
| C(6)–N(1)–Fe(1)   | 129.7(4)   | N(4)–C(9)–C(10)   | 121.7(5) |
| C(12)–N(1)–Fe(1)  | 113.6(3)   | N(4)–C(9)–C(8)    | 118.9(5) |
| C(1)–N(2)–C(7)    | 115.9(5)   | C(10)–C(9)–C(8)   | 119.4(5) |
| C(1)–N(2)–Fe(1)   | 129.5(4)   | N(5)–C(10)–C(9)   | 121.0(5) |
| C(7)–N(2)–Fe(1)   | 114.5(3)   | N(5)–C(10)–C(11)  | 118.3(5) |
| C(2)–N(3)–C(8)    | 116.8(5)   | C(9)–C(10)–C(11)  | 120.7(5) |
| C(2)–N(3)–Fe(2)   | 129.2(4)   | N(6)–C(11)–C(12)  | 121.2(5) |
| C(8)–N(3)–Fe(2)   | 114.0(4)   | N(6)–C(11)–C(10)  | 118.8(5) |
| C(3)–N(4)–C(9)    | 117.0(5)   | C(12)–C(11)–C(10) | 120.0(5) |
| C(3)–N(4)–Fe(2)   | 129.8(4)   | N(1)–C(12)–C(11)  | 121.8(5) |
| C(9)–N(4)–Fe(2)   | 113.1(3)   | N(1)–C(12)–C(7)   | 118.3(4) |
| C(4)–N(5)–C(10)   | 117.5(5)   | C(11)–C(12)–C(7)  | 119.9(5) |
